# Supplementary material for: Bone Marrow-Derived IL-1Ra Increases TNF Levels Poststroke
Source: MDPI journal article supplement (doi:10.3390/cells10040956), 2021-04-20
Supplement: s1 [file s1]

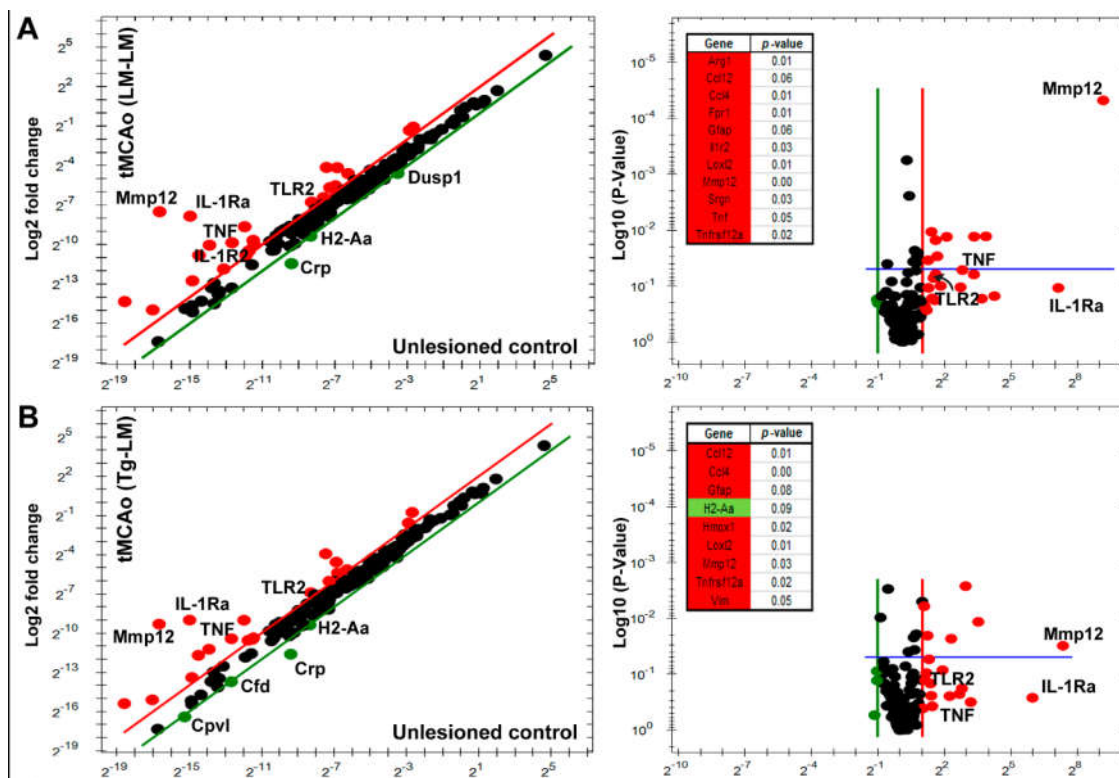

**Supplementary Figure S1.** Gene expression affected by post-stroke BM treatment in mice. (A–B) Scatter and Volcano plots showing gene changes in LM-LM treated ( $n = 5$  mice). (A) and Tg-LM treated mice ( $n = 5$  mice). (B) 24 hours after tMCAo compared to unlesioned control mice ( $n = 11$  mice).

Supplementary Table 1. Genes changes identified by comparison.

| Ctl<br>vs. |                  |                  | tMCAo<br>vs.         |                  | tMCAo<br>(LM-<br>LM) vs. |
|------------|------------------|------------------|----------------------|------------------|--------------------------|
| tMCAo      | tMCAo<br>(LM-LM) | tMCAo<br>(Tg-LM) | tMCAo<br>(LM-<br>LM) | tMCAo<br>(Tg-LM) | tMCAo<br>(Tg-LM)         |
| Ahnak      | Arg1             | Arg1             | Arg1                 | Arg1             | Arg1                     |
| Anxa1      | Ccl12            | Ccl12            | Cpvl                 | Btg1             | Cpvl                     |
| Arg1       | Ccl4             | Ccl4             | Cxcr2                | Ccr1             | Cxcr2                    |
| Ccl12      | Ccr1             | Ccr1             | Fabp4                | Ccr7             | Hp                       |
| Ccl4       | Crp              | Cfd              | Fpr1                 | Cfd              | Il1rn                    |
| Ccr1       | Cxcr2            | Cpvl             | Il1r2                | Cxcr2            | Mmp12                    |
| Cd163      | Dusp1            | Crp              | S100a8               | Fabp4            |                          |
| Cd36       | Fabp4            | Cxcr2            | S100a9               | Fpr1             |                          |
| Crp        | Fpr1             | Fabp4            | Slpi                 | Hp               |                          |
| Cxcr2      | Gfap             | Fkbp5            |                      | Ier3             |                          |
| Cyp1b1     | H2-Aa            | Fpr1             |                      | Il1r2            |                          |
| Dusp1      | Hmox1            | Gfap             |                      | Il1rn            |                          |
| Fabp4      | Hp               | H2-Aa            |                      | Mmp12            |                          |
| Fkbp5      | Il1r2            | Hmox1            |                      | S100a8           |                          |
| Fpr1       | Il1rn            | Il1r2            |                      | S100a9           |                          |
| Gfap       | Loxl2            | Il1rn            |                      | Slpi             |                          |
| Ghrl       | Mmp12            | Loxl2            |                      | Srgn             |                          |
| Hmox1      | Plin2            | Mmp12            |                      | Tnfrsf12a        |                          |
| Hp         | Slpi             | Srgn             |                      |                  |                          |
| Ier3       | Srgn             | Tlr2             |                      |                  |                          |
| Il13ra1    | Tlr2             | Tnf              |                      |                  |                          |
| Il1r2      | Tnc              | Tnfrsf12a        |                      |                  |                          |
| Il1rn      | Tnf              | Vim              |                      |                  |                          |
| Loxl2      | Tnfrsf12a        | Vsig4            |                      |                  |                          |
| Mmp12      | Vim              |                  |                      |                  |                          |
| Plin2      | Vsig4            |                  |                      |                  |                          |
| S100a8     |                  |                  |                      |                  |                          |
| S100a9     |                  |                  |                      |                  |                          |
| Slc6a4     |                  |                  |                      |                  |                          |
| Slpi       |                  |                  |                      |                  |                          |
| Srgn       |                  |                  |                      |                  |                          |
| Tlr2       |                  |                  |                      |                  |                          |
| Tlr7       |                  |                  |                      |                  |                          |
| Tnc        |                  |                  |                      |                  |                          |

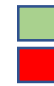

Upregulated genes

Downregulated genes

|           |  |  |  |  |  |  |
|-----------|--|--|--|--|--|--|
| Tnf       |  |  |  |  |  |  |
| Tnfrsf12a |  |  |  |  |  |  |
| Vim       |  |  |  |  |  |  |
| Vsig4     |  |  |  |  |  |  |
